# Supplementary material
Source: PubMed Central journal article supplement (PMC2944775)
Supplement: NIHMS233863-supplement-Supplement.pdf [file NIHMS233863-supplement-Supplement.pdf]

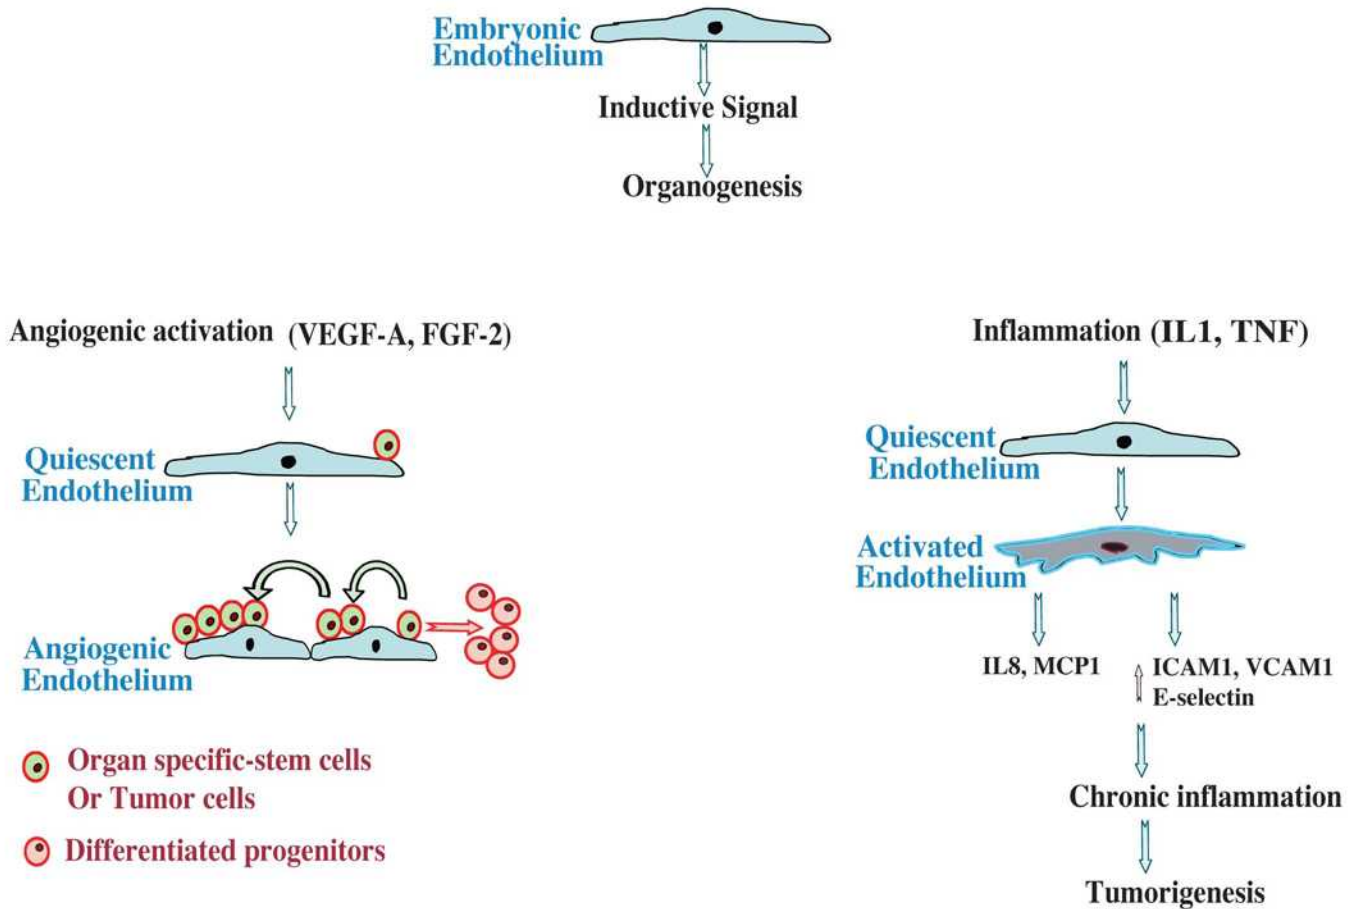

Supplemental Figure 1 | **Inductive and instructive angiocrine signals regulate tumorigenesis, organogenesis and tissue repair.** Embryonic endothelial cells through elaboration of inductive signals promote organogenesis. VEGFA and FGF2 through activation of the angiogenic signals stimulate the proliferation and differentiation of the haematopoietic stem and progenitor cells. Inflammatory signals imparted by IL1 and TNF through upregulation of the chemokines, IL8 and MCP1 and upregulation of the adhesion molecules ICAM1, VCAM1 and E selectin sustain chronic inflammation leading to tumorigenesis.
